# Supplementary material for: Cyclic voltammetry electrodeposition of well-dispersed Pd nanoparticles on carbon paper as a flow-through anode for microfluidic direct formate fuel cells
Source: Royal Society of Chemistry journal article supplement (doi:10.1039/d0nr05134a), 2020-01-01
Supplement: d0nr05134a1.pdf [file d0nr05134a1.pdf]

## Supporting Information

### **Cyclic voltammetry electrodeposition of well-dispersed Pd nanoparticles in carbon paper as a flow-through anode for a microfluidic direct formate fuel cell**

Tong Zhang,<sup>a,b</sup> Xun Zhu,<sup>\*a,b</sup> Ding-Ding Ye,<sup>\*a,b</sup> Rong Chen,<sup>a,b</sup> Yuan Zhou,<sup>a,b</sup> Qiang Liao,<sup>a,b</sup>

<sup>a</sup> Key Laboratory of Low-grade Energy Utilization Technologies and Systems (Chongqing University), Ministry of Education, Chongqing 400030, China.

<sup>b</sup> Institute of Engineering Thermophysics, School of Energy and Power Engineering, Chongqing University, Chongqing 400030, China

\* Corresponding Authors: Xun Zhu, Dingding Ye

E-mail address: [zhuxun@cqu.edu.cn](mailto:zhuxun@cqu.edu.cn) (X. Zhu), [dingdingye@cqu.edu.cn](mailto:dingdingye@cqu.edu.cn) (D.-D. Ye)

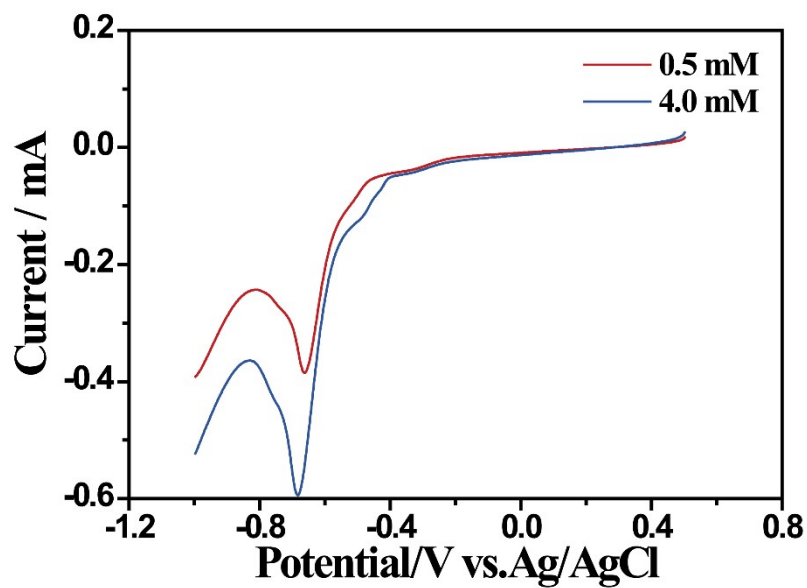

**Figure S1** Linear sweep voltammetry curves in different concentrations of  $\text{Pd}^{2+}$  at a scan rate of  $100\text{mV s}^{-1}$

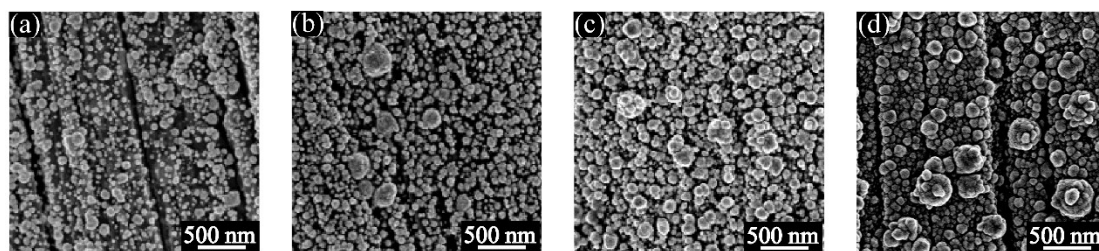

**Figure S2** Surface SEM images of the electrodes prepared by electrodeposition in different  $\text{Pd}(\text{NH}_3)_4\text{Cl}_2$  concentrations (a) 0.5 mM (b) 1 mM (c) 2 mM (d) 4 mM.

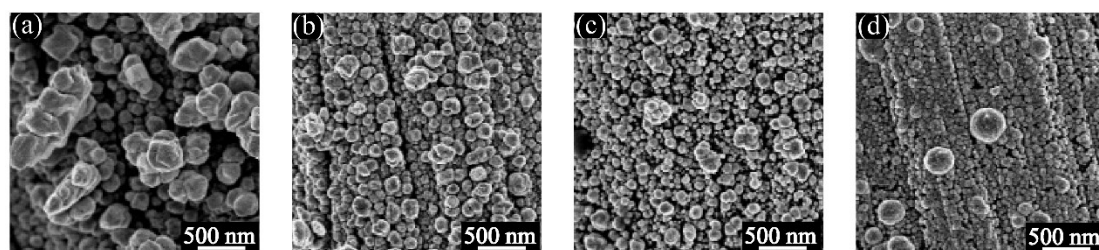

**Figure S3** The morphology of Pd catalyst particles on the electrodes prepared by electrodeposition in different scan rates (a)  $1.0\text{ mV s}^{-1}$  (b)  $2.5\text{ mV s}^{-1}$  (c)  $5.0\text{ mV s}^{-1}$  (d)  $10\text{ mV s}^{-1}$ .

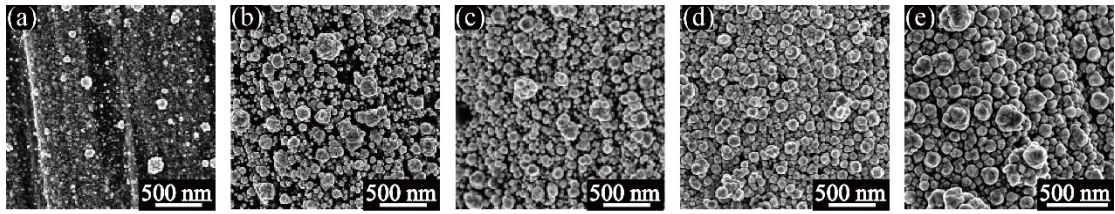

Figure S4 Surface SEM images of the electrodes prepared by electrodeposition with different cycle numbers (a) 1 cycle (b) 3 cycles (c) 5 cycles (d) 7 cycles (e) 10 cycles.

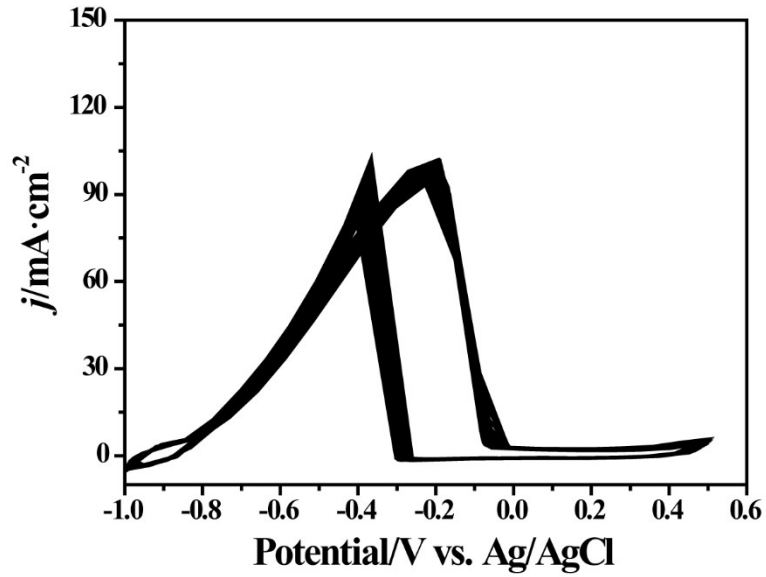

Figure S5 50 cycles in the presence of 1 M KOH + 0.5 M HCOONa at a scan rate of 10 mV s<sup>-1</sup>.

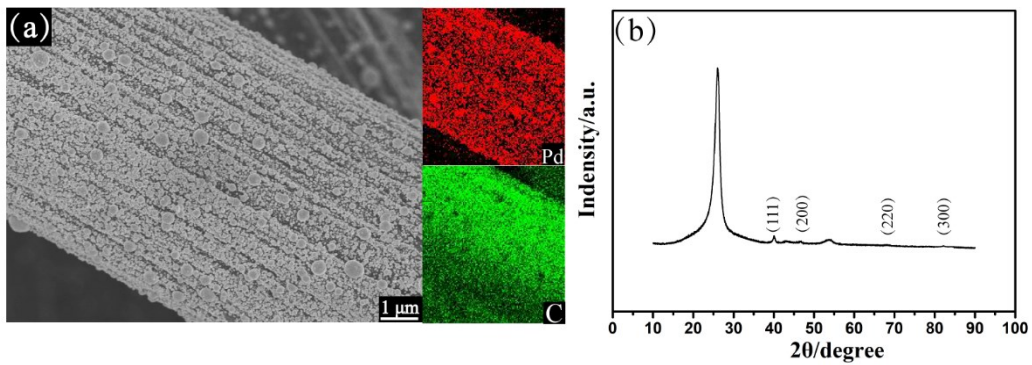

Figure S6 (a) SEM images and (b) XRD patterns of the Pd/CP electrode after CV test. Insets are corresponding EDS elemental mapping.

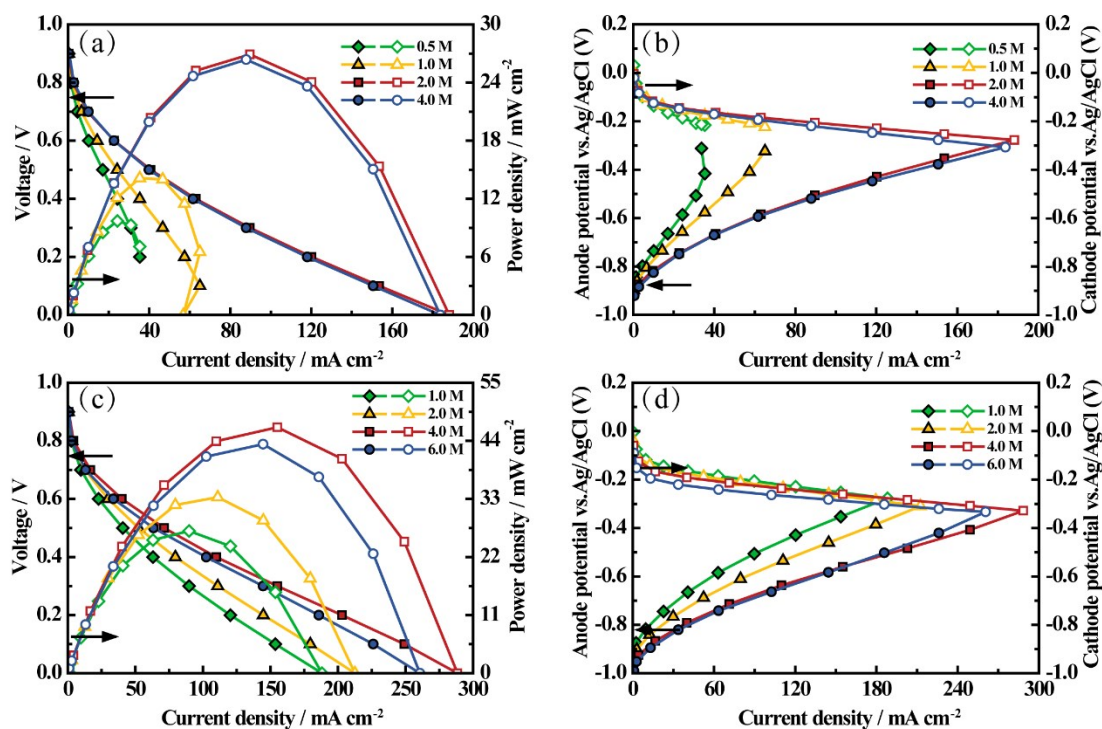

**Figure S7(a)** Polarization curves and (b) electrode potentials of the  $\mu$ DFFC operating in different fuel concentrations. (c) Polarization curves and (d) electrode potentials of the  $\mu$ DFFC operating in different electrolyte concentrations.

Figure S7 showed the fuel cell performance operating in different fuel and electrolyte concentration. Figure S7a and S7b show the cell performance measured at different fuel concentrations with 1 M KOH served as electrolyte, and the flow rate was kept at  $200 \mu\text{l min}^{-1}$ . From the Figure S7a, the peak power density of the fuel cell increases obviously from  $9.72 \text{ mW cm}^{-2}$  to  $14.1 \text{ mW cm}^{-2}$  and  $26.9 \text{ mW cm}^{-2}$  with increasing the fuel concentration form 0.5 M to 2 M. However, when the fuel concentration was increased to 4 M, the peak power density is  $26.3 \text{ mW cm}^{-2}$ , and the maximum current density is  $183.7 \text{ mA cm}^{-2}$ , which is a little lower than that at 2 M. It is note from Figure S7b that the cathode potential declined when the fuel concentration was increased from 2 M to 4 M. This demonstrates that fuel crossover occurred at higher fuel concentration, which reduces the cell

performance. The effect of electrolyte concentration on fuel cell performance was shown in Figure S7c and S7d. The fuel concentration was kept at 2 M and the flow rate was also maintained at 200  $\mu\text{l min}^{-1}$ . The cell performance increases with increase of electrolyte concentration, but is capped at electrolyte concentration over 4 M. The peak power density increases from 26.9  $\text{mW cm}^{-2}$  to 33.3  $\text{mW cm}^{-2}$  and 46.6  $\text{mW cm}^{-2}$  while the maximum current density of the fuel cell climbs from 188.1  $\text{mA cm}^{-2}$  to 212.6  $\text{mA cm}^{-2}$  and 288.4  $\text{mA cm}^{-2}$  when electrolyte concentration increases from 1 M to 3 M. The improvement of cell can be attributed to the increased ionic conductivity of the electrolyte with more hydroxyl ions and the enhanced anode reaction kinetics in higher concentration of KOH. Nevertheless, the cell performance reduces when the electrolyte increases to 6 M. The peak power density and maximum current density drop to 43.3  $\text{mW cm}^{-2}$  and 260.6  $\text{mA cm}^{-2}$ , respectively. As shown in Figure S7d, when the electrolyte concentration changes from 4 M to 6 M, the cathode potential declines. The weakened cell performance is due to higher hydroxide ion concentration can suppress the cathode reaction kinetic <sup>1</sup>.

**Table S1** Comparison of the cell performance of this work with other microfluidic fuel cells reported in the literatures

| References                            | Electrolyte                    | Oxidant           | Fuel   | Catalyst loading<br>(anode)<br>( $\text{mg}_{\text{Pd}} \text{cm}^{-2}$ ) | I <sub>max</sub><br>(mA<br>$\text{cm}^{-2}$ ) | P <sub>max</sub><br>(mW<br>$\text{cm}^{-2}$ ) |
|---------------------------------------|--------------------------------|-------------------|--------|---------------------------------------------------------------------------|-----------------------------------------------|-----------------------------------------------|
| Kjeang et al. <sup>2</sup>            | NaOH                           | NaClO             | HCOONa | 5                                                                         | 230                                           | 52                                            |
| Nguyen et al. <sup>3</sup>            | H <sub>2</sub> SO <sub>4</sub> | Air               | HCOOH  | 7-8                                                                       | 120                                           | 26.5                                          |
| Chavez-Ramírez<br>et al. <sup>4</sup> | H <sub>2</sub> SO <sub>4</sub> | Air               | HCOOH  | 1                                                                         | 152                                           | 27.3                                          |
| Sung et al. <sup>5</sup>              | H <sub>2</sub> SO <sub>4</sub> | KMnO <sub>4</sub> | HCOOH  | No date                                                                   | 37                                            | 13                                            |

|                                  |                                |                               |               |              |              |             |
|----------------------------------|--------------------------------|-------------------------------|---------------|--------------|--------------|-------------|
| Alonso-Vante et al. <sup>6</sup> | H <sub>2</sub> SO <sub>4</sub> | O <sub>2</sub>                | HCOOH         | 5            | 102          | 23          |
| Ye et al. <sup>7</sup>           | NaOH                           | H <sub>2</sub> O <sub>2</sub> | HCOONa        | 5            | 56.6         | 20.7        |
| <b>This work</b>                 | <b>NaOH</b>                    | <b>Air</b>                    | <b>HCOONa</b> | <b>0.105</b> | <b>288.4</b> | <b>46.6</b> |

---

## Supplementary References

1. B. Zhang, D.-D. Ye, J. Li, X. Zhu and Q. Liao, *Electrochimical Acta*, 2015, **177**, 264-269.
2. E. Kjeang, R. Michel, D. A. Harrington, D. Sinton and N. Djilali, *Electrochimical Acta*, 2008, **54**, 698-705.
3. S. A. M. Shaegh, N.-T. Nguyen, S. H. Chan and W. Zhou, *International journal of hydrogen energy*, 2012, **37**, 3466-3476.
4. A. Moreno-Zuria, A. Dector, F. Cuevas-Muñiz, J. Esquivel, N. Sabaté, J. Ledesma-García, L. Arriaga and A. Chávez-Ramírez, *Journal of power sources*, 2014, **269**, 783-788.
5. H. B. Park, K. H. Lee and H. J. Sung, *Journal of power sources*, 2013, **226**, 266-271.
6. J. Ma, A. S. Gago and N. Alonso-Vante, *Journal of The Electrochemical Society*, 2013, **160**, F859-F866.
7. Z. Liu, D. Ye, R. Chen, B. Zhang, X. Zhu, J. Li and Q. Liao, *International Journal of Hydrogen Energy*, 2018, **43**, 22467-22473.
